# Supplementary material for: Insect Collections as an Untapped Source of Bioactive Compounds—Fireflies (Coleoptera: Lampyridae) and Cardiotonic Steroids as a Proof of Concept
Source: MDPI journal article supplement (doi:10.3390/insects12080689), 2021-07-31
Supplement: s1 [file s1]

# Insect Collections as an Untapped Source of Bioactive Compounds—Fireflies (Coleoptera: Lampyridae) and Cardiotonic Steroids as a Proof of Concept

Andreas Berger <sup>1,†</sup>, Georg Petschenka <sup>2,†,\*</sup>, Thomas Degenkolb <sup>1</sup>, Michael Geisthardt <sup>3</sup> and Andreas Vilcinskas <sup>1,4,\*</sup>

## Supplementary Materials

**Table 1.** Beetle specimens analyzed in this study. Months are indicated by Roman numerals. The country of origin was translated into English for ease of interpretation, all other information is presented as on the original label. AB: A. Berger, AE: A. Elbert, DE: D. Erber, MG: M. Geisthardt, WH: W. Höhner, WL: W. Lucht, HV: H. Vogt; coll. AB = collection Andreas Berger, coll. ME = collection Manfred Egger, MfN = Museum für Naturkunde Berlin, SMF = Senckenberg Museum Frankfurt.

| Sample ID | Family     | Species                                               | Subfamily     | Collection Date | Location                             | Collector | Determined | Collection | Sex |
|-----------|------------|-------------------------------------------------------|---------------|-----------------|--------------------------------------|-----------|------------|------------|-----|
| 60        | Lampyridae | <i>Lamprohiza delarouzei</i> (Jacquelin du Val, 1859) | Lamprohizinae | n.d.            | France, Marseille                    | Anney     | MG         | MfN        |     |
| 52        | Lampyridae | <i>Lamprohiza mulsantii</i> (Kiesenwetter, 1850)      | Lamprohizinae | n.d.            | Italy, Imperia Sanremo               | Schneider | MG         | MfN        | ♂   |
| 53        | Lampyridae | <i>Lamprohiza mulsantii</i> (Kiesenwetter, 1850)      | Lamprohizinae | n.d.            | Italy, Imperia Bordighera            | Schneider | MG         | MfN        | ♀   |
| 64        | Lampyridae | <i>Lamprohiza paulinoi</i> (Olivier, 1884)            | Lamprohizinae | n.d.            | Spain                                | Olivier   | MG         | SMF        | ♂   |
| 27        | Lampyridae | <i>Lamprohiza splendidula</i> (Linnaeus, 1767)        | Lamprohizinae | 14.VI.2007      | Greece, Peleponnes Kalavrila Vrachny | M. Egger  | MG         | coll. ME   | ♂   |
| 63        | Lampyridae | <i>Lamprohiza splendidula</i> (Linnaeus, 1767)        | Lamprohizinae | 29.VI.2015      | Germany, Hessen                      | A. Berger | AB         | coll. AB   | ♀   |

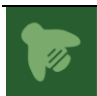

|    |                |                                                             |            |            | Maintal,<br>Wachenbuchen               |               |    |          |   |  |
|----|----------------|-------------------------------------------------------------|------------|------------|----------------------------------------|---------------|----|----------|---|--|
| 51 | Lampyrid<br>ae | <i>Lampyris algerica<br/>levigata</i><br>(Geisthardt, 1983) | Lampyrinae | 15.VI.2011 | Tunisia,<br>Tabarka<br>Umg. Golfhotel  | M. Egger      | MG | coll. ME | ♂ |  |
| 70 | Lampyrid<br>ae | <i>Lampyris algerica<br/>levigata</i><br>(Geisthardt, 1983) | Lampyrinae | 15.VI.2011 | Tunisia,<br>Tabarka<br>Umg. Golfhotel  | M. Egger      | MG | coll. ME | ♀ |  |
| 65 | Lampyrid<br>ae | <i>Lampyris ambigena</i><br>(Jacquelin du Val,<br>1860)     | Lampyrinae | n.d.       | Italy,<br>Sizilien                     | Failla        | MG | SMF      | ♂ |  |
| 35 | Lampyrid<br>ae | <i>Lampyris ambigena</i><br>(Jacquelin du Val,<br>1860)     | Lampyrinae | n.d.       | Italy,<br>Sizilien<br>Madonio          | Geo. C.<br>Kr | MG | MfN      | ♂ |  |
| 66 | Lampyrid<br>ae | <i>Lampyris ambigena</i><br>(Jacquelin du Val,<br>1860)     | Lampyrinae | n.d.       | Italy,<br>Sizilien<br>Madonio          | Geo. C.<br>Kr | MG | MfN      | ♂ |  |
| 67 | Lampyrid<br>ae | <i>Lampyris angustula</i><br>(Fairmaire, 1895)              | Lampyrinae | n.d.       | Turkey,<br>ca. 60 km SE<br>Tunceli     | n.d.          | MG | SMF      | ♂ |  |
| 68 | Lampyrid<br>ae | <i>Lampyris brutia</i><br>(Costa, 1882)                     | Lampyrinae | 1905       | Italy,<br>Sant Eufemia<br>d'Aspromonte | Paoanetti     | MG | SMF      | ♂ |  |
| 69 | Lampyrid<br>ae | <i>Lampyris germariensis</i><br>(Jacquelin du Val,<br>1860) | Lampyrinae | 15.IV.1964 | Croatia,<br>Spalato                    | Baganetti     | MG | SMF      | ♂ |  |
| 50 | Lampyrid<br>ae | <i>Lampyris germariensis</i><br>(Jacquelin du Val,<br>1860) | Lampyrinae | 27.VI.1989 | Croatia,<br>Istrien<br>Porec           | Popp          | MG | coll. ME | ♂ |  |

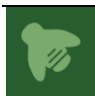

|    |                |                                                         |            |             |                                                      |           |    |          |   |
|----|----------------|---------------------------------------------------------|------------|-------------|------------------------------------------------------|-----------|----|----------|---|
| 29 | Lampyrid<br>ae | <i>Lampyris hellenica</i><br>(Geisthardt, 1983)         | Lampyrinae | 14.VI.1996  | Greece,<br>Südpeleponnes<br>Mani, Stoupa             | M. Egger  | MG | coll. ME | ♂ |
| 48 | Lampyrid<br>ae | <i>Lampyris hellenica</i><br>(Geisthardt, 1983)         | Lampyrinae | 10.VI.1996  | Greece,<br>Südpeleponnes<br>Mani, Pargos             | M. Egger  | MG | coll. ME | ♂ |
| 71 | Lampyrid<br>ae | <i>Lampyris lareynii</i><br>(Jacquelin du Val,<br>1859) | Lampyrinae | n.d.        | France,<br>Corsica                                   | Lasegn.   | MG | SMF      | ♂ |
| 56 | Lampyrid<br>ae | <i>Lampyris lareynii</i><br>(Jacquelin du Val,<br>1859) | Lampyrinae | n.d.        | France,<br>Corsica                                   | n.d.      | MG | MfN      | ♂ |
| 22 | Lampyrid<br>ae | <i>Lampyris noctiluca</i><br>(Linnaeus, 1767)           | Lampyrinae | 08.VII.1989 | Austria,<br>Wien<br>Lainzer<br>Tiergarten            | M. Egger  | MG | coll. ME | ♂ |
| 23 | Lampyrid<br>ae | <i>Lampyris noctiluca</i><br>(Linnaeus, 1767)           | Lampyrinae | 30.VI.1989  | Italy,<br>Prov. Bozen<br>Auer<br>Castelfeder         | M. Egger  | MG | coll. ME | ♂ |
| 24 | Lampyrid<br>ae | <i>Lampyris noctiluca</i><br>(Linnaeus, 1767)           | Lampyrinae | 30.VII.2004 | Bulgaria,<br>Burgas<br>südl. Duni                    | M. Egger  | MG | coll. ME | ♂ |
| 62 | Lampyrid<br>ae | <i>Lampyris noctiluca</i><br>(Linnaeus, 1767)           | Lampyrinae | 07.VII.2006 | Germany,<br>Sachsen<br>Johnsdorf bei<br>Königswartha | A. Berger | AB | coll. AB | ♀ |
| 72 | Lampyrid<br>ae | <i>Lampyris pallida</i><br>(Geisthardt, 1987)           | Lampyrinae | 1920        | Malta,<br>Citadelle<br>Pleimes                       | n.d.      | MG | SMF      | ♂ |



|    |            |                                                  |            |               |                                      |            |    |          |   |
|----|------------|--------------------------------------------------|------------|---------------|--------------------------------------|------------|----|----------|---|
| 73 | Lampyridae | <i>Lampyris pseudozenkeri</i> (Geisthardt, 1999) | Lampyrinae | 1899          | Turkey, Anatolien Konia              | Korb       | MG | SMF      | ♂ |
| 74 | Lampyridae | <i>Lampyris pseudozenkeri</i> (Geisthardt, 1999) | Lampyrinae | 1899          | Turkey, Anatolien Konia              | Korb       | MG | SMF      | ♂ |
| 75 | Lampyridae | <i>Lampyris raymondi</i> (Mulsant & Rey, 1859)   | Lampyrinae | n.d.          | France, Gallia                       | unbekannt  | MG | SMF      | ♂ |
| 55 | Lampyridae | <i>Lampyris raymondi</i> (Mulsant & Rey, 1859)   | Lampyrinae | 01.VI.1944    | France, Umg. Toulon                  | F. Ermisch | MG | MfN      | ♂ |
| 76 | Lampyridae | <i>Lampyris raymondi</i> (Mulsant & Rey, 1859)   | Lampyrinae | 01.VI.1944    | France, Umg. Toulon                  | F. Ermisch | MG | MfN      | ♂ |
| 77 | Lampyridae | <i>Lampyris sardiniae</i> (Geisthardt, 1987)     | Lampyrinae | 30.V.1995     | Italy, Sardinien Capo Coda, Cavallo  | M. Egger   | MG | coll. ME | ♂ |
| 30 | Lampyridae | <i>Lampyris sardiniae</i> (Geisthardt, 1987)     | Lampyrinae | 19.V.1995     | Italy, Sardinien Capo Coda           | M. Egger   | MG | coll. ME | ♂ |
| 31 | Lampyridae | <i>Lampyris sardiniae</i> (Geisthardt, 1987)     | Lampyrinae | 10-24.VI.2005 | Italy, Sardinien Porto Pollo         | R. Lubi    | MG | coll. ME | ♂ |
| 32 | Lampyridae | <i>Lampyris sardiniae</i> (Geisthardt, 1987)     | Lampyrinae | 01.V.1914     | Italy, Sardinien Oristano            | Geisler    | MG | MfN      | ♂ |
| 20 | Lampyridae | <i>Lampyris zenkeri</i> (Germar, 1817)           | Lampyrinae | 19.VII.2006   | Greece, Chalkidiki n. Silhonia Plana | M. Egger   | MG | coll. ME | ♂ |



|    |            |                                                            |               |                        |                                                      |            |    |          |   |
|----|------------|------------------------------------------------------------|---------------|------------------------|------------------------------------------------------|------------|----|----------|---|
| 21 | Lampyridae | <i>Lampyris zenkeri</i><br>(Germar, 1817)                  | Lampyrinae    | 23.VII.<br>-05.08.1990 | Greece,<br>Prov. Larisa<br>Stonio                    | M. Egger   | MG | coll. ME | ♂ |
| 78 | Lampyridae | <i>Lampyris zenkeri</i><br>(Germar, 1817)                  | Lampyrinae    | 11.VII.1998            | Greece,<br>Preveza<br>Kanali                         | M. Egger   | MG | coll. ME | ♂ |
| 28 | Lampyridae | <i>Lampyroidea achaiaca</i><br>(Geisthardt, 1999)          | Lamprohizinae | 13.VI.2007             | Greece,<br>Peleponnes<br>Kalavrita,<br>Abzw. Kerpini | M. Egger   | MG | coll. ME | ♂ |
| 49 | Lampyridae | <i>Lampyroidea achaiaca</i><br>(Geisthardt, 1999)          | Lamprohizinae | 13.VI.2007             | Greece,<br>Peleponnes<br>Kalavrita,<br>Abzw. Kerpini | M. Egger   | MG | coll. ME | ♂ |
| 54 | Lampyridae | <i>Lampyroidea dispar</i><br>(Fairmaire, 1857)             | Lamprohizinae | VI.1902                | Iran,<br>Ala-Dagh.<br>Bodschnurd<br>1033m            | Hauser     | MG | MfN      | ♂ |
| 61 | Lampyridae | <i>Lampyroidea syriaca</i><br>(Costa, 1875)                | Lamprohizinae | n.d.                   | Syria,<br>Küste                                      | J. Greiner | MG | MfN      | ♂ |
| 18 | Lampyridae | <i>Luciola (Luciola) italica</i><br>(Linnaeus, 1767)       | Luciolinae    | 26.VI.1990             | Italy,<br>Prov. Bozen<br>Kalterersee                 | M. Egger   | MG | coll. ME | ♂ |
| 19 | Lampyridae | <i>Luciola (Luciola) italica</i><br>(Linnaeus, 1767)       | Luciolinae    | 22.VII.1989            | Italy,<br>Prov. TV Miane<br>Campea                   | M. Egger   | MG | coll. ME | ♂ |
| 16 | Lampyridae | <i>Luciola (Luciola) lusitanica</i><br>(Charpentier, 1825) | Luciolinae    | 31.VII.2014            | Italy,<br>Piemont, Laux<br>Talhang nachts            | A. Berger  | AB | coll. AB | ♂ |



|    |                |                                                                      |            |              |                                                                   |           |    |          |   |
|----|----------------|----------------------------------------------------------------------|------------|--------------|-------------------------------------------------------------------|-----------|----|----------|---|
| 17 | Lampyrid<br>ae | <i>Luciola (Luciola)</i><br><i>lusitanica</i><br>(Charpentier, 1825) | Luciolinae | 01.VIII.2014 | Italy,<br>Piemont, Villar<br>Perosa<br>ca.500m ü NN,<br>Flussufer | A. Berger | AB | coll. AB | ♂ |
| 57 | Lampyrid<br>ae | <i>Luciola (Luciola) novaki</i><br>(Muller, 1946)                    | Luciolinae | 28.IV.1936   | Bar Mont.                                                         | Novak     | MG | MfN      | ♂ |
| 79 | Lampyrid<br>ae | <i>Nyctophila bonvouloirii</i><br>(Jacquelin du Val,<br>1860)        | Lamyprinae | n.d.         | Italy,<br>Sizilien                                                | n.d.      | MG | SMF      | ♂ |
| 80 | Lampyrid<br>ae | <i>Nyctophila heydeni</i><br>(Olivier, 1884)                         | Lamyprinae | n.d.         | Spain,<br>Balearen                                                | Wili.     | MG | SMF      | ♂ |
| 81 | Lampyrid<br>ae | <i>Nyctophila libani</i><br>(Laporte de Castelnau,<br>1833)          | Lamyprinae | n.d.         | Syria                                                             | n.d.      | MG | SMF      | ♂ |
| 82 | Lampyrid<br>ae | <i>Nyctophila maculicollis</i><br>(Fairmaire, 1866)                  | Lamyprinae | n.d.         | Iran,<br>Masanderan                                               | Reitter   | MG | SMF      | ♂ |
| 83 | Lampyrid<br>ae | <i>Nyctophila molesta</i><br>(Jacquelin du Val,<br>1859)             | Lamyprinae | n.d.         | Italy,<br>boreal                                                  | n.d.      | MG | SMF      | ♂ |
| 58 | Lampyrid<br>ae | <i>Nyctophila molesta</i><br>(Jacquelin du Val,<br>1859)             | Lamyprinae | 22.VII.1910  | Italy,<br>Liguria<br>Borghetto                                    | n.d.      | MG | MfN      | ♂ |
| 84 | Lampyrid<br>ae | <i>Nyctophila reichii</i><br>(Jacquelin du Val,<br>1859)             | Lamyprinae | 1900         | AK Chehir ?                                                       | Korb.     | MG | SMF      | ♂ |

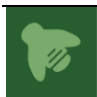

|    |            |                                                       |            |            |                                         |                |    |          |   |
|----|------------|-------------------------------------------------------|------------|------------|-----------------------------------------|----------------|----|----------|---|
| 25 | Lampyridae | <i>Nyctophila reichii</i><br>(Jacquelin du Val, 1859) | Lamyprinae | 18.VI.2010 | Spain<br>Prov. Granada<br>Benamaurel    | H. Rietz       | MG | coll. ME | ♂ |
| 26 | Lampyridae | <i>Nyctophila reichii</i><br>(Jacquelin du Val, 1859) | Lamyprinae | n.d.       | n.d.                                    | J. Greiner     | MG | MfN      | ♂ |
| 85 | Lampyridae | <i>Pelania mauritanica</i><br>(Linnaeus, 1767)        | Lamyprinae | n.d.       | Algeria,<br>Ain Fezza                   | n.d.           | MG | SMF      | ♂ |
| 33 | Lampyridae | <i>Pelania mauritanica</i><br>(Linnaeus, 1767)        | Lamyprinae | n.d.       | Algeria,<br>Oran<br>Lalla-<br>Maghrnia  | V.M.<br>Duchon | MG | MfN      | ♂ |
| 59 | Lampyridae | <i>Pelania mauritanica</i><br>(Linnaeus, 1767)        | Lamyprinae | n.d.       | Algeria,<br>Oran<br>Lalla-<br>Maghrnia  | V.M.<br>Duchon | MG | MfN      | ♂ |
| 86 | Lampyridae | <i>Phosphaenus hemipterus</i><br>(Goeze, 1777)        | Lamyprinae | 25.VI.2016 | Germany,<br>Witzenhausen<br>NSG Roßbach | A. Berger      | AB | coll. AB | ♂ |
| 34 | Lampyridae | <i>Phosphaenus hemipterus</i><br>(Goeze, 1777)        | Lamyprinae | 27.VI.1932 | Austria,<br>Voralberg<br>Feldkirch      | Dr. Feige      | MG | MfN      | ♂ |
| 87 | Lampyridae | <i>Phosphaenus hemipterus</i><br>(Goeze, 1777)        | Lamyprinae | 27.VI.1932 | Austria,<br>Voralberg<br>Feldkirch      | Dr. Feige      | MG | MfN      | ♂ |
| 36 | Lycidae    | <i>Dictyoptera aurora</i><br>(Herbst, 1874)           | Erotinae   | 06.IV.1957 | Germany,<br>Hessen<br>Groß-Gerau        | H. Vogt        | HV | SMF      | / |
| 42 | Lycidae    | <i>Dictyoptera aurora</i><br>(Herbst, 1874)           | Erotinae   | 04.VI.2015 | Austria,<br>Bad                         | A. Berger      | WH | coll. AB | / |



|    |         |                                                         |                   |             |                                                    |           |    |                       |   |
|----|---------|---------------------------------------------------------|-------------------|-------------|----------------------------------------------------|-----------|----|-----------------------|---|
|    |         |                                                         |                   |             | Eisenkappel<br>Hochobir auf<br>Blüte               |           |    |                       |   |
| 38 | Lycidae | <i>Erotides cosnardi</i><br>(Chevrolat, 1839)           | Erotinae          | 11.VI.1958  | Germany,<br>NRW,<br>Siebengebirge<br>Ölberg        | W. Lucht  | WL | Senckenberg<br>Museum | / |
| 41 | Lycidae | <i>Erotides cosnardi</i><br>(Chevrolat, 1839)           | Erotinae          | 11.VI.2007  | Germany,<br>MV, Thissow<br>Strand<br>angespült     | A. Berger | AB | coll. AB              | / |
| 44 | Lycidae | <i>Lopheros rubens</i><br>(Gyllenhal, 1817)             | Erotinae          | 23.VII.1963 | Austria,<br>Kärnten<br>Zellpfarre                  | A. Elbert | AE | coll. AB              | / |
| 45 | Lycidae | <i>Lopheros rubens</i><br>(Gyllenhal, 1817)             | Erotinae          | 27.VII.1962 | Austria,<br>Kärnten<br>Zellpfarre                  | A. Elbert | AE | coll. AB              | / |
| 39 | Lycidae | <i>Lygistopterus<br/>sanguineus</i><br>(Linnaeus, 1758) | Calochromi<br>nae | 05.VI.2008  | Germany,<br>Hessen<br>Wüstensachsen<br>, Stirnberg | A. Berger | AB | coll. AB              | / |
| 43 | Lycidae | <i>Lygistopterus<br/>sanguineus</i><br>(Linnaeus, 1758) | Calochromi<br>nae | 10.VI.2006  | Germany,<br>Sachsen<br>Neschwitz                   | A. Berger | AB | coll. AB              | / |
| 37 | Lycidae | <i>Platycis minutus</i><br>(Fabricius, 1787)            | Erotinae          | 06.VII.1981 | Germany,<br>Fränk. Schweiz<br>Rabeneck             | D. Erber  | DE | Senckenberg<br>Museum | / |
| 47 | Lycidae | <i>Platycis minutus</i><br>(Fabricius, 1787)            | Erotinae          | 16.IX.1967  | Germany,<br>Eifel<br>Kyllburg                      | W. Lucht  | WL | Senckenberg<br>Museum | / |





---

|    |         |                                                 |          |             |                                          |           |    |          |   |
|----|---------|-------------------------------------------------|----------|-------------|------------------------------------------|-----------|----|----------|---|
| 40 | Lycidae | <i>Pyropterus nigroruber</i><br>(De Geer, 1774) | Erotinae | 11.VII.2015 | Germany,<br>Zwingenberg<br>NSG Orbishöhe | A. Berger | AB | coll. AB | / |
|----|---------|-------------------------------------------------|----------|-------------|------------------------------------------|-----------|----|----------|---|

---

**Table 2.** Pseudomolecular ions of lucibufagins from firefly specimens that were positively screened via HPLC-DAD (subset).

| Sample | Species                       | <i>m/z</i> | tr major components | <i>m/z</i> | tr minor components |
|--------|-------------------------------|------------|---------------------|------------|---------------------|
| LK2    | <i>P. pyralis</i>             | 449,2175   | 10,3-10,8           | 547,2471   | 14,6-14,7           |
|        |                               | 491,2272   | 12,2-12,5           | 561,2634   | 15,7-15,8           |
|        |                               | 533,2363   | 13,3-13,7           |            |                     |
| 51     | <i>L. algerica levigata</i> ♂ | 449,2188   | 10,2-11,2           |            |                     |
|        |                               | 447,2047   | 11,8-12,0           |            |                     |
|        |                               | 433,2253   | 12,1-12,2           | /          | /                   |
|        |                               | 491,2278   | 11,6-12,0           |            |                     |
|        |                               | 547,2557   | 15,4-15,7           |            |                     |
| 70     | <i>L. algerica levigata</i> ♀ | 449,2163   | 9,9-10,6            | 505,2433   | 11,5-12,0           |
|        |                               | 433,2234   | 10,9-12,4           | 561,2660   | 12,8-13,0           |
|        |                               |            |                     | 563,2511   | 12,3-12,7           |
|        |                               |            |                     | 491,2251   | 12,3-12,7           |
| 35     | <i>L. ambigena</i> ♂          | 449,2188   | 9,8-10,6            | 491,2260   | 11,0-11,6           |
|        |                               | 433,2242   | 10,1-10,3           | 549,2687   | 11,0-11,2           |
|        |                               | 435,2397   | 10,6-10,7           | 533,2394   | 13,0-13,3           |
|        |                               | 447,2044   | 11,8-12,0           |            |                     |
| 66     | <i>L. ambigena</i> ♂          | 449,2146   | 9,7-10,1            | 491,2214   | 10,9-11,4           |
|        |                               | 433,2200   | 10,1-10,3           | 549,2621   | 10,9-11,4           |
|        |                               | 447,2000   | 11,4-12,3           | 477,2190   | 10,9-11,4           |
|        |                               |            |                     | 533,2771   | 13,2-13,5           |
| 67     | <i>L. angustula</i> ♂         | 449,2134   | 9,8-10,7            | 433,2196   | 10,8-11,3           |
|        |                               | 565,2611   | 11,3-11,7           | 563,2460   | 12,4-12,6           |
|        |                               | 491,2238   | 12,4-12,6           | 549,2269   | 13,2-13,6           |
| 68     | <i>L. brutia</i> ♂            | 449,2151   | 10,2-10,5           |            |                     |
|        |                               | 565,2610   | 10,9-11,3           |            |                     |
|        |                               | 433,2212   | 11,3-11,7           | 477,2426   | 10,9-12,0           |
|        |                               | 491,2613   | 11,7-12,0           | 447,2007   | 11,7-12,0           |
|        |                               | 549,2666   | 11,7-12,4           |            |                     |
|        |                               | 533,2668   | 12,9-13,1           |            |                     |
| 69     | <i>L. germariensis</i> ♂      |            |                     | 433,2045   | 10,3-10,6           |
|        |                               | 449,2142   | 9,7-10,1            | 563,2473   | 10,5-11,0           |
|        |                               | 491,2238   | 10,9-11,3           | 477,2177   | 10,9-11,3           |
|        |                               | 447,2013   | 11,2-11,5           | 505,2017   | 11,5-11,9           |
|        |                               |            |                     | 593,2877   | 11,8-12,4           |
|        |                               |            |                     | 533,2377   | 13,1-13,4           |
| 29     | <i>L. hellenica</i> ♂         |            |                     | 433,2404   | 10,2-10,3           |
|        |                               |            |                     | 449,2187   | 10,5-10,7           |
|        |                               | 563,2485   | 13,1-13,5           | 505,2046   | 11,1-11,5           |
|        |                               |            |                     | 447,2049   | 11,5-11,7           |
|        |                               |            |                     | 491,2261   | 12,5-12,7           |
| 48     | <i>L. hellenica</i> ♂         | 447,2059   | 10,0-10,2           | 549,2293   | 12,5-12,7           |
|        |                               | 563,2514   | 13,2-13,4           | 449,2173   | 10,4-10,6           |
|        |                               | 491,2273   | 12,4-12,7           | 505,2070   | 11,1-11,5           |
|        |                               | 549,2340   | 12,4-12,7           |            |                     |

|    |                           |          |           |          |           |
|----|---------------------------|----------|-----------|----------|-----------|
| 56 | <i>L. lareynii</i> ♂      | 449,2184 | 9,8-10,7  | 447,2057 | 10,4-10,7 |
|    |                           |          |           | 505,2345 | 11,3-12,0 |
|    |                           |          |           | 477,2429 | 11,3-11,7 |
| 71 | <i>L. lareynii</i> ♂      | 449,2161 | 9,8-10,7  | 491,2263 | 11,3-11,7 |
|    |                           | 447,2034 | 11,8-12,2 | 433,2229 | 11,8-12,2 |
|    |                           |          |           | 533,2401 | 11,8-13,2 |
|    |                           |          |           | 547,2503 | 13,1-13,4 |
| 22 | <i>L. noctiluca</i> ♂     | 449,2160 | 10,1-11,1 |          |           |
|    |                           | 491,2250 | 10,9-11,1 | 505,2103 | 11,1-11,4 |
|    |                           | 433,2234 | 11,4-11,6 | 533,2366 | 11,7-12,0 |
|    |                           | 477,2448 | 11,4-11,6 | 547,2147 | 13,4-13,7 |
|    |                           | 447,2025 | 11,7-12,0 |          |           |
|    |                           | 529,2073 | 13,4-13,7 |          |           |
| 23 | <i>L. noctiluca</i> ♂     | 449,2153 | 9,8-10,5  |          |           |
|    |                           | 433,2225 | 11,4-11,6 | 447,2017 | 11,2-11,4 |
|    |                           | 491,2259 | 12,3-12,6 |          |           |
| 24 | <i>L. noctiluca</i> ♂     | 575,2496 | 14,7-15,1 | 449,2158 | 10,4-10,9 |
|    |                           | 593,2568 | 14,2-14,4 | 491,2258 | 10,4-10,9 |
|    |                           |          |           | 505,2039 | 10,5-11,1 |
|    |                           |          |           | 549,2307 | 11,8-12,1 |
| 62 | <i>L. noctiluca</i> ♀     | 449,2186 | 9,8-10,4  | 491,2280 | 12,3-12,8 |
|    |                           | 433,2255 | 10,7-13,4 | 447,2051 | 10,7-11,2 |
| 72 | <i>L. pallida</i> ♂       | 449,2172 | 9,7-10,7  | 477,2435 | 10,9-11,3 |
|    |                           | 491,2275 | 11,3-12,6 | 447,2050 | 11,3-11,6 |
|    |                           |          |           | 433,2236 | 11,7-12,1 |
|    |                           |          |           | 533,2421 | 12,7-13,2 |
| 73 | <i>L. pseudozenkeri</i> ♂ | /        | /         | 449,2053 | 9,5-11,6  |
|    |                           |          |           | 491,2262 | 10,9-12,6 |
|    |                           |          |           | 565,2628 | 10,9-11,3 |
|    |                           |          |           | 433,2243 | 11,3-11,6 |
|    |                           |          |           | 505,2404 | 11,7-12,0 |
|    |                           |          |           | 533,2403 | 12,3-12,6 |
|    |                           |          |           | 563,2506 | 12,3-12,6 |
| 74 | <i>L. pseudozenkeri</i> ♂ | /        | /         | 433,2358 | 10,5-11,7 |
|    |                           |          |           | 449,2145 | 10,5-10,8 |
|    |                           |          |           | 491,2258 | 11,0-11,7 |
|    |                           |          |           | 565,2620 | 11,3-11,7 |
|    |                           |          |           | 533,2394 | 12,4-12,8 |
|    |                           |          |           | 563,2497 | 12,4-12,8 |
| 55 | <i>L. raymondi</i> ♂      | 449,2182 | 9,9-10,1  | 477,2460 | 11,8-12,1 |
|    |                           | 491,2281 | 11,4-12,5 | 533,2453 | 11,8-12,1 |
|    |                           | 563,2520 | 11,4-11,6 | 447,2060 | 11,8-12,1 |
|    |                           |          |           | 433,2261 | 11,8-12,1 |
| 75 | <i>L. raymondi</i> ♂      | /        | /         | 449,2152 | 10,5-11,0 |
|    |                           |          |           | 447,2038 | 10,7-10,9 |
| 76 | <i>L. raymondi</i> ♂      | 449,2167 | 9,8-10,8  | 433,2254 | 11,0-11,5 |
|    |                           | 565,2632 | 10,8-11,8 | 477,2445 | 11,5-11,8 |
|    |                           | 491,2271 | 11,5-12,8 | 549,2670 | 11,8-12,3 |
|    |                           |          |           | 447,2039 | 11,8-12,3 |

|    |                          |          |           |          |           |
|----|--------------------------|----------|-----------|----------|-----------|
|    |                          |          |           | 563,2509 | 12,3-12,8 |
|    |                          |          |           | 533,2433 | 12,8-13,5 |
| 30 | <i>L. sardiniae</i> ♂    | 449,2164 | 10,2-10,8 |          |           |
|    |                          | 477,2481 | 11,3-11,6 | 447,2034 | 10,6-10,8 |
|    |                          | 491,2267 | 12,3-12,5 | 563,2507 | 14,1-14,3 |
|    |                          | 533,2356 | 13,2-13,5 |          |           |
| 31 | <i>L. sardiniae</i> ♂    |          |           | 435,2395 | 10,7-10,9 |
|    |                          |          |           | 449,2205 | 10,7-10,9 |
|    |                          | 565,2668 | 11,3-11,5 | 433,2239 | 11,3-11,5 |
|    |                          |          |           | 491,2339 | 12,8-13,0 |
|    |                          |          |           | 477,2478 | 11,5-11,7 |
| 77 | <i>L. sardiniae</i> ♂    |          |           | 533,2699 | 12,8-13,0 |
|    |                          |          |           | 449,2239 | 9,9-10,2  |
|    |                          |          |           | 491,2278 | 11,4-11,7 |
|    |                          | 477,2471 | 11,4-11,7 | 565,2650 | 11,4-11,7 |
|    |                          |          |           | 563,2519 | 14,1-14,3 |
|    |                          |          |           | 547,2512 | 14,1-14,3 |
| 20 | <i>L. zenkeri</i> ♂      |          |           | 533,2424 | 13,3-13,8 |
|    |                          | 491,2261 | 11,4-11,6 | 447,2040 | 10,0-10,2 |
| 21 | <i>L. zenkeri</i> ♂      |          |           | 449,2161 | 10,3-10,5 |
|    |                          | 449,2160 | 10,2-11,2 |          |           |
|    |                          | 491,2264 | 11,0-11,2 |          |           |
|    |                          | 491,2263 | 11,4-12,1 | 533,2368 | 11,1-11,4 |
|    |                          | 433,2234 | 11,3-11,6 | 477,2447 | 11,3-11,6 |
| 78 | <i>L. zenkeri</i> ♂      | 447,2035 | 11,8-12,1 |          |           |
|    |                          |          |           | 433,2293 | 10,5-10,9 |
|    |                          | 491,2286 | 11,0-11,2 | 447,2044 | 10,5-10,9 |
|    |                          | 449,2186 | 11,2-11,5 | 477,2450 | 11,5-11,7 |
|    |                          | 533,2422 | 12,2-12,5 | 563,2533 | 13,9-14,4 |
|    |                          |          |           | 547,2196 | 13,9-14,4 |
| 80 | <i>N. heydeni</i> ♂      | 449,2186 | 9,8-10,2  | 593,2941 | 12,5-12,8 |
| 81 | <i>N. libani</i> ♂       | /        | /         | 447,2046 | 11,0-11,5 |
|    |                          |          |           | 433,2255 | 10,4-10,6 |
| 82 | <i>N. maculicollis</i> ♂ | 449,2184 | 8,9-10,2  | 477,2474 | 10,7-11,0 |
|    |                          | 447,2066 | 10,4-10,8 | 433,2243 | 11,0-11,5 |
| 58 | <i>N. molesta</i> ♂      |          |           | 549,2705 | 11,8-12,3 |
|    |                          | 449,2188 | 9,8-10,6  |          |           |
|    |                          | 491,2287 | 10,9-11,0 | 477,2446 | 11,0-11,2 |
|    |                          | 447,2053 | 11,3-11,4 | 533,2591 | 13,3-13,5 |
|    |                          | 593,2975 | 11,4-11,6 |          |           |
| 83 | <i>N. molesta</i> ♂      | 491,2312 | 12,3-12,6 |          |           |
|    |                          | 449,2196 | 9,7-11,7  | 491,2292 | 11,0-12,2 |
|    |                          | 433,2270 | 11,2-11,7 | 477,2493 | 11,2-11,7 |
| 25 | <i>N. reichii</i> ♂      | 447,2064 | 11,8-12,2 | 593,2954 | 11,8-12,2 |
|    |                          |          |           | 491,2262 | 11,3-12,1 |
|    |                          | 449,2178 | 10,3-10,5 | 447,2039 | 11,3-11,6 |
|    |                          |          |           | 433,2240 | 11,7-12,1 |

|    |                         |          |           |          |           |
|----|-------------------------|----------|-----------|----------|-----------|
| 26 | <i>N. reichii</i> ♂     | 449,2175 | 9,8-10,5  |          |           |
|    |                         | 447,2030 | 11,8-12,0 | 565,2646 | 11,4-11,5 |
|    |                         | 491,2251 | 11,8-12,0 | 433,2226 | 11,4-11,5 |
|    |                         | 533,2368 | 13,2-13,5 |          |           |
| 84 | <i>N. reichii</i> ♂     |          |           | 491,2314 | 10,9-12,7 |
|    |                         | 449,2204 | 10,2-11,3 | 433,2280 | 11,3-11,7 |
|    |                         | 447,2069 | 11,8-12,2 | 565,2671 | 11,3-11,7 |
|    |                         |          |           | 533,2443 | 12,3-13,4 |
|    |                         |          |           | 547,2497 | 13,9-14,1 |
| 33 | <i>P. mauritanica</i> ♂ | 449,2151 | 9,7-10,1  | 447,2052 | 11,8-12,1 |
|    |                         | 449,2199 | 10,2-10,6 | 565,2676 | 10,7-11,0 |
|    |                         | 449,2100 | 11,8-12,1 |          |           |
| 59 | <i>P. mauritanica</i> ♂ | 449,2193 | 10,2-11,2 | 433,2251 | 10,9-11,2 |
|    |                         | 447,2050 | 11,4-12,1 |          |           |
| 85 | <i>P. mauritanica</i> ♂ |          |           | 433,2272 | 11,5-12,3 |
|    |                         | 449,2210 | 9,8-10,6  | 565,2675 | 11,5-12,3 |
|    |                         | 447,2073 | 11,5-12,3 | 549,2706 | 12,4-12,9 |
|    |                         | 491,2310 | 11,5-12,3 | 563,2564 | 12,4-12,9 |
|    |                         |          |           | 533,2636 | 12,4-12,9 |
| 34 | <i>P. hemipterus</i> ♂  | /        | /         | 491,2268 | 11,0-11,8 |
|    |                         |          |           | 533,2386 | 13,2-14,6 |
|    |                         |          |           | 433,2235 | 12,0-12,2 |
| 86 | <i>P. hemipterus</i> ♂  |          |           | 477,2716 | 11,3-11,7 |
|    |                         |          |           | 491,2308 | 11,3-12,2 |
|    |                         | /        | /         | 565,2674 | 11,3-11,7 |
|    |                         |          |           | 433,2282 | 11,7-12,2 |
|    |                         |          |           | 549,2729 | 11,7-12,2 |
|    |                         |          |           | 533,2452 | 13,2-13,5 |
| 87 | <i>P. hemipterus</i> ♂  |          |           | 491,2312 | 10,9-12,2 |
|    |                         | /        | /         | 433,2281 | 11,7-12,2 |
|    |                         |          |           | 549,2719 | 11,7-12,2 |
|    |                         |          |           | 565,2690 | 11,7-12,2 |
|    |                         |          |           | 533,2453 | 12,6-13,0 |

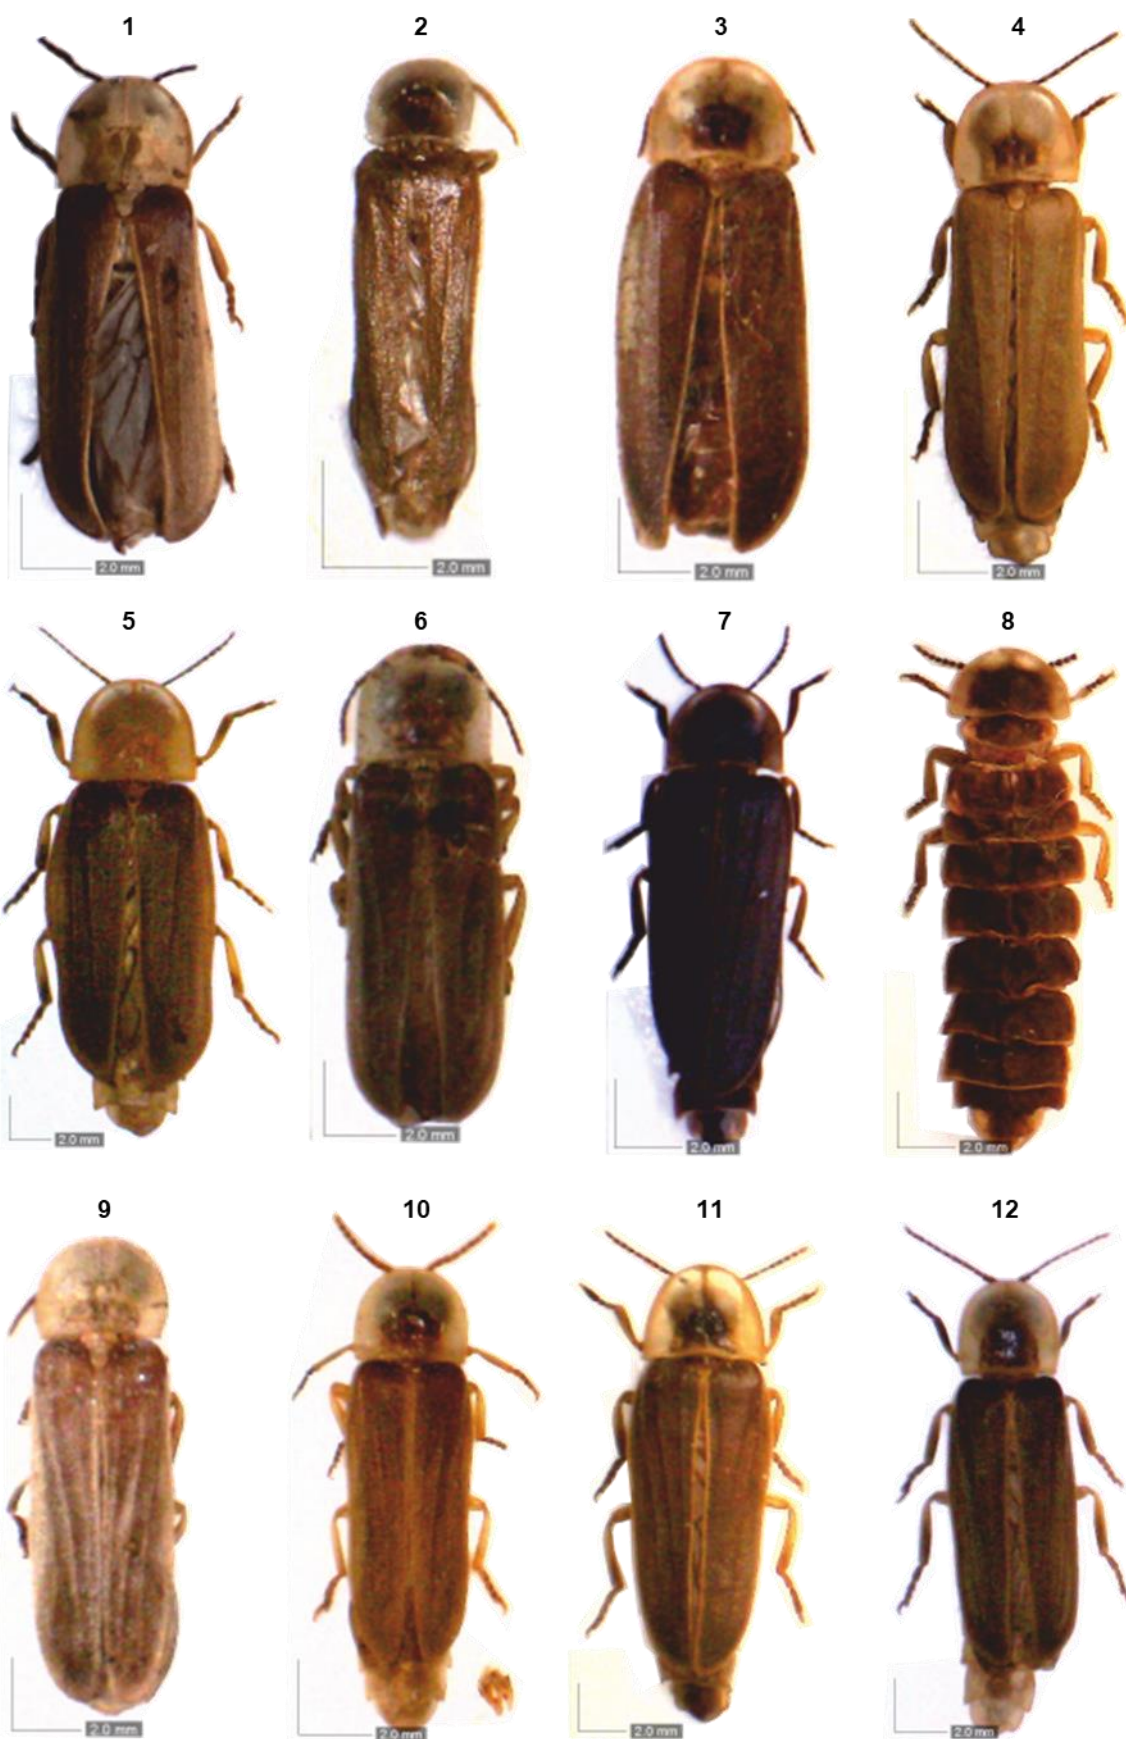

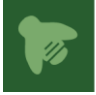

13

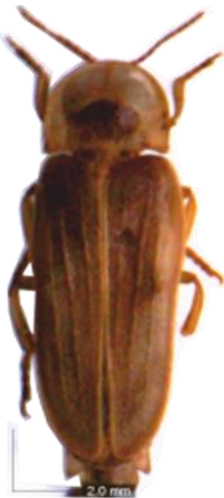

14

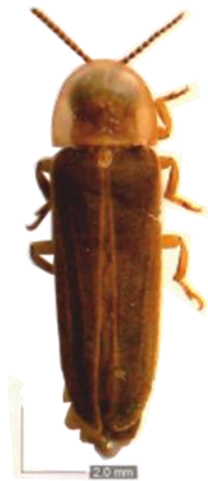

15

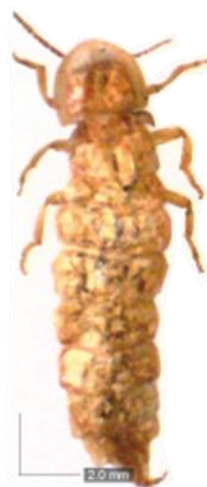

16

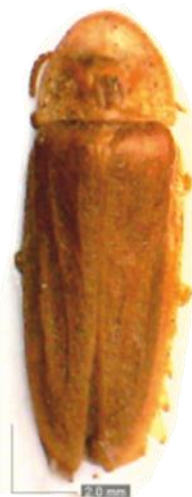

17

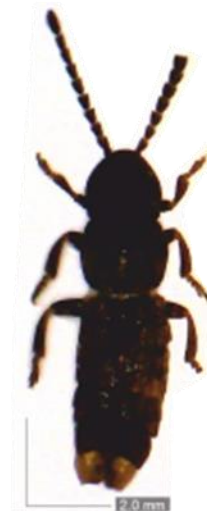

18

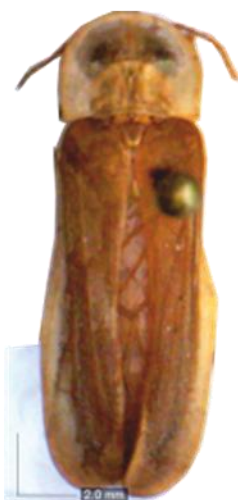

19

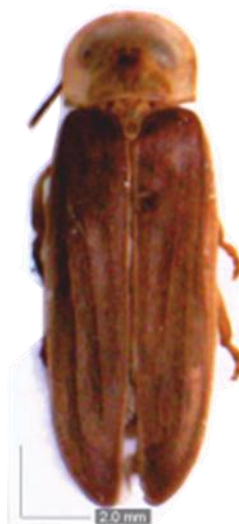

20

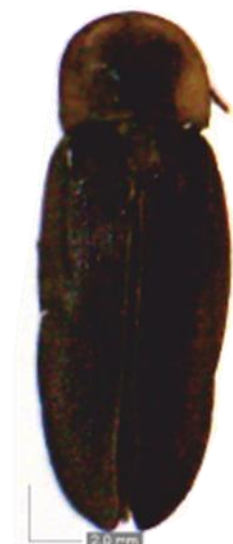



21

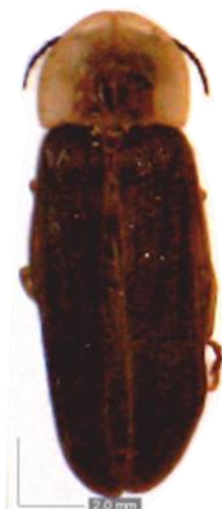

22

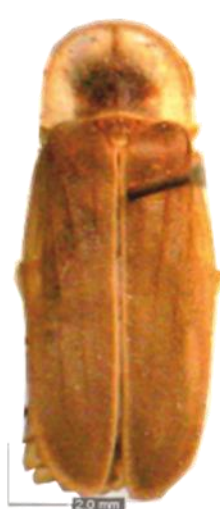

23

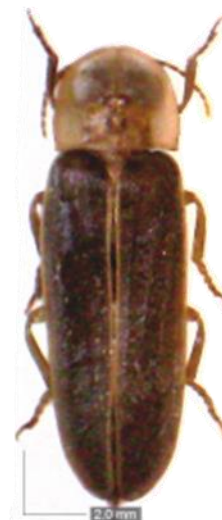

24

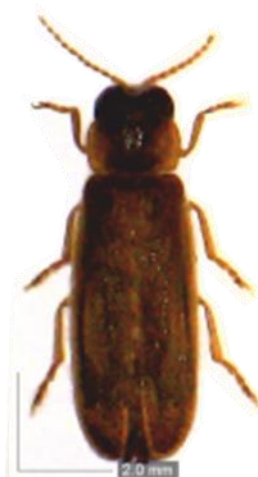

25

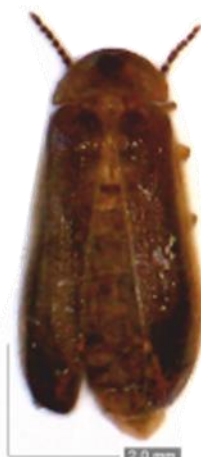

26

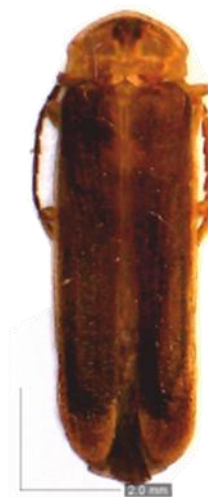

27

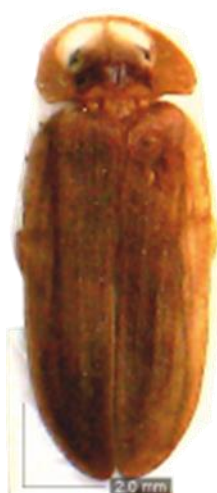

28

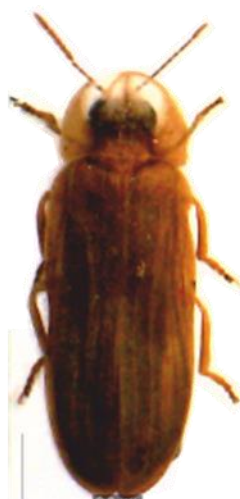

29

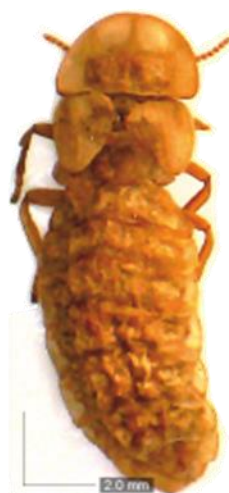

30

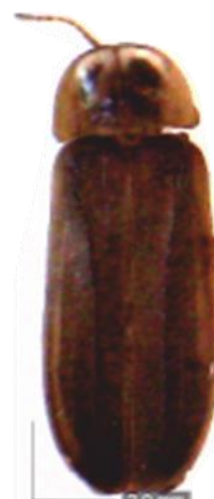



31

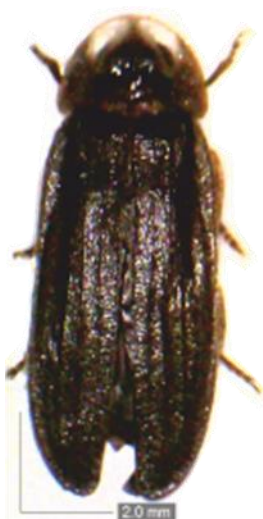

32

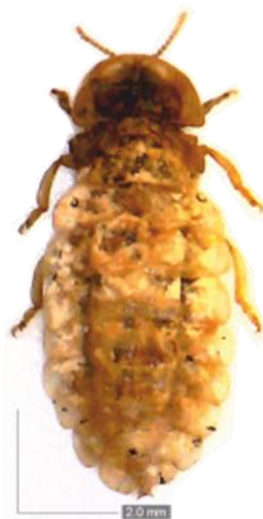

35

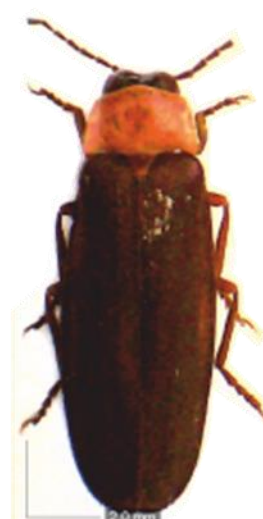

33

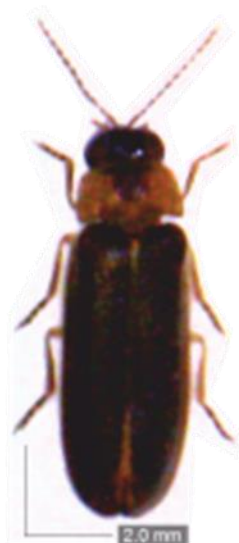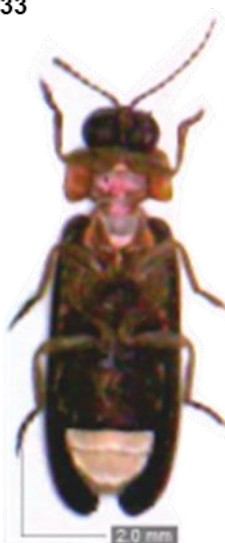

34

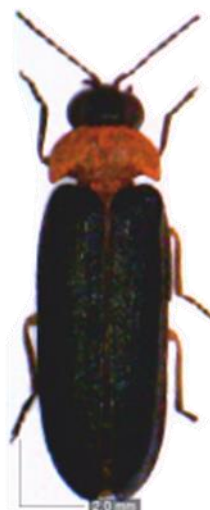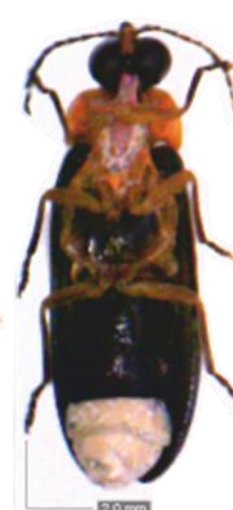

36

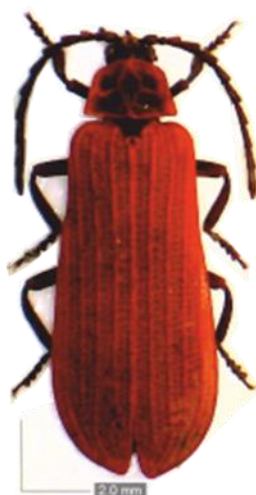

37

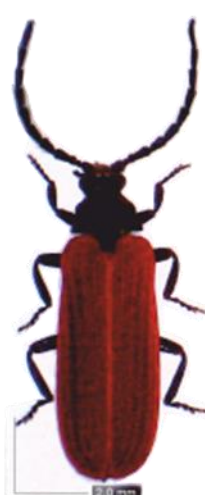

38

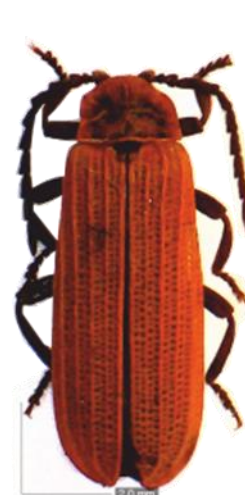

**Figure S1.** Specimens after methanol extraction. 1, *Lampyris ambigena* ♂; 2, *L. angustula* ♂; 3, *L. brutia* ♂; 4, *L. germariensis* ♂; 5, *L. hellenica* ♂; 6, *L. lareynii* ♂; 7, *L. noctiluca* ♂; 8, *L. noctiluca* ♀; 9, *L. pallida* (paratype) ♂; 10, *L. pseudozenkeri* ♂; 11, *L. raymondi* ♂; 12, *L. sardiniae* ♂; 13, *L. zenkeri* ♂; 14, *L. algerica levigata* ♂; 15, *L. algerica levigata* ♀; 16, *Pelania mauritanica* ♂; 17, *Phosphaenus hemipterus* ♂; 18 *Nyctophila bonvouloirii* ♂; 19, *N. heydeni* ♂; 20, *N. libani* ♂; 21, *N. maculicollis* ♂; 22, *N. molesta* ♂; 23, *N. reichii* ♂; 24, *Lampyroidea achaiaca* ♂; 25, *L. dispar* ♂; 26, *L. syriaca* ♂; 27, *Lamprohiza delarouzei* ♂; 28, *L. mulsantii* ♂; 29, *L. mulsantii* ♀; 30, *L. paulinoi* ♂; 31, *L. splendidula* ♂; 32 *L. splendidula* ♀; 33, *Luciola italica* ♂; 34, *L. lusitanica* ♂; 35, *L. novaki* ♂; 36, *Dictyoptera aurora*; 37, *Pyropterus nigroruber*; 38, *Lopheros rubens*; 39, *Platycis minutes*; 40, *Erotides cosnardi*; 41, *Lygistopterus sanguineus*.
